# Supplementary material for: The interferon-induced antiviral protein PML (TRIM19) promotes the restriction and transcriptional silencing of lentiviruses in a context-specific, isoform-specific fashion
Source: PubMed Central journal article supplement (PMC4802722; doi:10.1186/s12977-016-0253-1), 2016-03-22
Supplement: 12977_2016_253_MOESM3_ESM.pdf [file 12977_2016_253_MOESM3_ESM.pdf]

|                       |                                                                                                               |
|-----------------------|---------------------------------------------------------------------------------------------------------------|
| Mouse PML forward     | 5'CACGGATCCACCATGGAAACTGAACCAGTTTCC 3'                                                                        |
| Mouse PML reverse     | 5'ATCCAATTGCTAGGCCAGGCATCCCTTACTTTCAGC 3'                                                                     |
| Human PML forward     | 5'AATTAGTCGACGGATCCACCATGGACTACAAAGACGATG<br>ACGACAAGGAGCCTGCACCCGCCCGATC 3'                                  |
| Human PML-I reverse   | 5'ATCCAATTGTCAGCTCTGCTGGGAGGCCCTCTCTG 3'                                                                      |
| Human PML-II reverse  | 5'ATCGAATTCTCAGAGGCCTGCTTGACGGGCGCCTG 3'                                                                      |
| Human PML-III reverse | 5'ATCCAATTGTCAGCGGGCTGGTGGGGAGGCCAAG 3'                                                                       |
| Human PML-IV reverse  | 5'AGCCAATTGCTAAATTAGAAAGGGGTGGGGGTAGC 3'                                                                      |
| Human PML-V reverse   | 5'AGCCAATTGTCAATGCCTCACTGGAAAATCCCCAG 3'                                                                      |
| Human PML-VI reverse  | 5'ATCCAATTGTCACCACAACGCGTTCCTCTCCCTACC 3'                                                                     |
| shPML1                | 5'TGCTGTTGACAGTGAGCGCAAGATGCAGCTGTATCCAAG<br>ATAGTGAAGCCACAGATGTATCTTGGATACAGCTGCATCTT<br>TTGCCTACTGCCTCGGA3' |
| shPML2                | 5'TGCTGTTGACAGTGAGCGAGCAAGACCAACAACATCTTC<br>TTAGTGAAGCCACAGATGTAAGAAGATGTTGTTGGTCTTGC<br>GTGCCTACTGCCTCGGA3' |
| shPML3                | 5'TGCTGTTGACAGTGAGCGCGCACACGCTGTGCTCAGGAT<br>GTAGTGAAGCCACAGATGTACATCCTGAGCACAGCGTGTG<br>CATGCCTACTGCCTCGGA3' |
| GFP forward           | 5'GACGACGGCAACTACAAGAC3'                                                                                      |
| GFP reverse           | 5'CGGATCTTGAAGTTCACCTTG3'                                                                                     |
| 2-LTR circles forward | 5'AACTAGGGAACCCACTGCTTAAG3'                                                                                   |
| 2-LTR circles reverse | 5'TCCACAGATCAAGGATATCTTGTC3'                                                                                  |
| Actin forward         | 5'CCTCCCTGGAGAAGAGCTA3'                                                                                       |
| Actin reverse         | 5'ACGTCACACTTCATGGA3'                                                                                         |

**Additional file 3. Sequences of primer ODNs used in this study.**
